# Supplementary material for: Explanatory Cognitive Diagnosis Models Incorporating Item Features
Source: MDPI journal article supplement (doi:10.3390/jintelligence12030032), 2024-03-11
Supplement: s1 [file s1]

# Explanatory Cognitive Diagnosis Models Incorporating Item Features

## Online Supplementary Documents

Table S1

*Q-matrix Used in the Analyses*

| Item | Number | Geometric shapes and measures | Data display |
|------|--------|-------------------------------|--------------|
| 1    | 0      | 0                             | 1            |
| 2    | 0      | 0                             | 1            |
| 3    | 0      | 0                             | 1            |
| 4    | 1      | 0                             | 1            |
| 5    | 1      | 1                             | 1            |
| 6    | 1      | 0                             | 1            |
| 7    | 0      | 1                             | 1            |
| 8    | 0      | 0                             | 1            |
| 9    | 0      | 1                             | 0            |
| 10   | 0      | 1                             | 1            |
| 11   | 1      | 0                             | 0            |
| 12   | 0      | 0                             | 1            |
| 13   | 0      | 0                             | 1            |
| 14   | 0      | 0                             | 1            |
| 15   | 0      | 0                             | 1            |
| 16   | 0      | 0                             | 1            |
| 17   | 1      | 0                             | 1            |
| 18   | 1      | 0                             | 1            |
| 19   | 0      | 1                             | 0            |
| 20   | 0      | 1                             | 0            |
| 21   | 0      | 1                             | 0            |
| 22   | 0      | 1                             | 1            |
| 23   | 0      | 1                             | 0            |
| 24   | 1      | 0                             | 1            |
| 25   | 1      | 0                             | 0            |
| 26   | 0      | 0                             | 1            |
| 27   | 0      | 0                             | 1            |
| 28   | 0      | 0                             | 1            |
| 29   | 0      | 0                             | 1            |
| 30   | 0      | 0                             | 1            |
| 31   | 1      | 0                             | 1            |
| 32   | 1      | 0                             | 1            |
| 33   | 0      | 1                             | 0            |
| 34   | 0      | 0                             | 1            |
| 35   | 0      | 1                             | 0            |
| 36   | 0      | 1                             | 1            |
| 37   | 0      | 1                             | 0            |

Table S2

*Descriptions of the Eight Item Features Used in the Analyses*

| Feature label                                           | Description                                                                                                                                                                                                                                                                                                                                                              |
|---------------------------------------------------------|--------------------------------------------------------------------------------------------------------------------------------------------------------------------------------------------------------------------------------------------------------------------------------------------------------------------------------------------------------------------------|
| Word token <sup>a</sup>                                 | The number of words excluding punctuation in the stem.                                                                                                                                                                                                                                                                                                                   |
| Number of adjectives                                    | The number of adjectives in the stem.                                                                                                                                                                                                                                                                                                                                    |
| Number of adverbs                                       | The number of adverbs in the stem.                                                                                                                                                                                                                                                                                                                                       |
| Story or not                                            | Binary indicator of whether the item has a story context (1=Yes; 0=No).                                                                                                                                                                                                                                                                                                  |
| Item type                                               | Binary indicator of whether the item is a multiple choice item or a constructed response item (1=Multiple choice; 0=Constructed response).                                                                                                                                                                                                                               |
| Proportion of words with 6 or more letters <sup>a</sup> | The proportion of words with 6 or more letters in the stem.                                                                                                                                                                                                                                                                                                              |
| Number of non Dale-Chall words <sup>a</sup>             | The number of words that are not in the Dale-Chall word list. Dale-Chall word list contains around 3000 words that are most familiar to the fifth-grade children. When 80% of the fourth-graders who participated in the readability study indicated they knew a word, the word was added to the Dale-Chall word list using the Dale-Chall formula (Dale & Chall, 1948). |
| Brown News popularity <sup>a</sup>                      | The popularity of verbs, nouns, adjectives, adverbs, and names in the Brown News Corpus. Brown News Corpus is a reference database in natural language processing that contains a total of 100,554 words.                                                                                                                                                                |

<sup>a</sup>Based on Drum et al. (1981); Lepik (1990); and Paap et al. (2015).

Table S3

*Item Features that were Created but not Included in the Analyses*

| Feature label                                     | Description                                                                                                                                                                                    |
|---------------------------------------------------|------------------------------------------------------------------------------------------------------------------------------------------------------------------------------------------------|
| Number of letters (alphabet only)                 | The number of alphabet letters in the stem.                                                                                                                                                    |
| Number of letters (numbers only)                  | The number of numbers in the stem.                                                                                                                                                             |
| Number of letters (including alphabet and number) | The number of alphabet letters and numbers in the stem.                                                                                                                                        |
| Number of letters (all included)                  | The number of letters including alphabet, number, space, punctuation, etc., in the stem.                                                                                                       |
| Number of words (alphabet only)                   | The number of words in the stem, excluding numbers and units.                                                                                                                                  |
| Number of unique words (Word type)                | The number of words excluding word repetition and punctuation (i.e., Vocabulary size) in the stem.                                                                                             |
| Word diversity                                    | The ratio of “word type” to “word token”.                                                                                                                                                      |
| Number of verbs                                   | The number of verbs in the stem.                                                                                                                                                               |
| Number of nouns                                   | The number of nouns in the stem.                                                                                                                                                               |
| Number of content words                           | The number of content words in the stem. Content words include nouns, verbs (except <i>to be</i> ), adjectives and adverbs (except quantifiers or intensifiers).                               |
| Number of unique content words                    | The number of unique content words in the stem.                                                                                                                                                |
| Proportion of content words                       | The proportion of content words in the stem (i.e., ratio of “number of content words” to “word token”).                                                                                        |
| Number of function words                          | The number of function words in the stem. Function words serve to express grammatical relationships in sentence. Examples of function words are <i>almost</i> , <i>about</i> and <i>even</i> . |
| Number of words with 6 or more letters            | The number of words with 6 or more letters in the stem.                                                                                                                                        |
| Mean word length                                  | The ratio of “Number of letters (alphabet only)” to “Number of words (alphabet only)”.                                                                                                         |
| Number of sentences                               | The number of sentences in the stem.                                                                                                                                                           |

Table S4

*Descriptive Statistics of Item Features*

| Feature name                                | Mean  | SD    | Min  | Max  |
|---------------------------------------------|-------|-------|------|------|
| Word token                                  | 21.92 | 11.73 | 7    | 67   |
| Number of adjectives                        | 1.46  | 1.32  | 0    | 6    |
| Number of adverbs                           | 0.43  | 0.60  | 0    | 2    |
| Story or not                                | 0.54  | -     | 0    | 1    |
| Item type                                   | 0.57  | -     | 0    | 1    |
| Proportion of tokens with 6 or more letters | 0.24  | 0.10  | 0.06 | 0.47 |

|                                |       |       |      |        |
|--------------------------------|-------|-------|------|--------|
| Number of non Dale-Chall words | 4.54  | 3.24  | 0    | 13     |
| Brown News popularity          | 31.79 | 24.00 | 6.50 | 140.50 |

Table S5

*Correlation among the Predicted or Estimated Guessing / Slipping Parameters from the Data Fitting Models*

| Model                                | HO-DINA     | IE-HO-DINA (without a residual term) |
|--------------------------------------|-------------|--------------------------------------|
| IE-HO-DINA (without a residual term) | 0.42 / 0.70 |                                      |
| IE-HO-DINA-R                         | 1.00 / 1.00 | 0.43 / 0.70                          |

Note. The guessing and slipping parameters from the HO-DINA model are estimated values; The guessing and slipping parameters from the IE-HO-DINA or IE-HO-DINA-R models are predicted values based on the item features and feature coefficients. Values in the each cell indicate the correlations for the guessing / slipping parameters.

Table S6

*Attribute Profile Classification Consistency Among the Data Fitting Models*

| Model          | HO-DINA | IE-HO-DINA-g | IE-HO-DINA-g-R | IE-HO-DINA-s |
|----------------|---------|--------------|----------------|--------------|
| IE-HO-DINA-g   | 0.65    |              |                |              |
| IE-HO-DINA-g-R | 0.98    | 0.64         |                |              |
| IE-HO-DINA-s   | 0.58    | 0.37         | 0.59           |              |
| IE-HO-DINA-s-R | 0.97    | 0.64         | 0.98           | 0.59         |

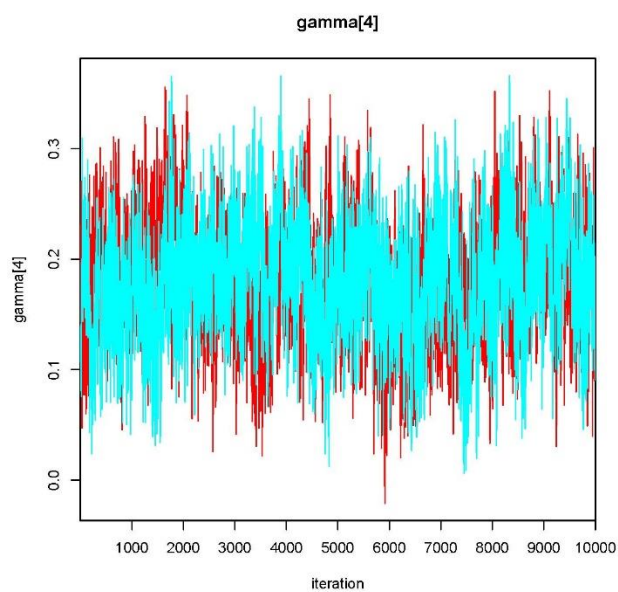

(a)

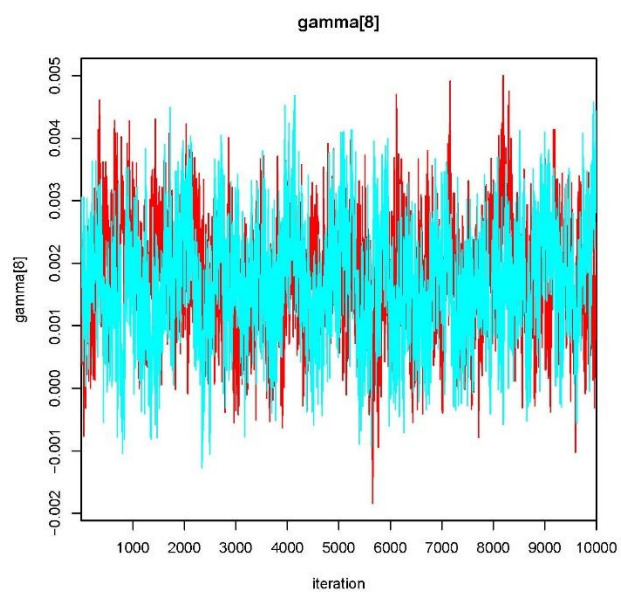

(b)

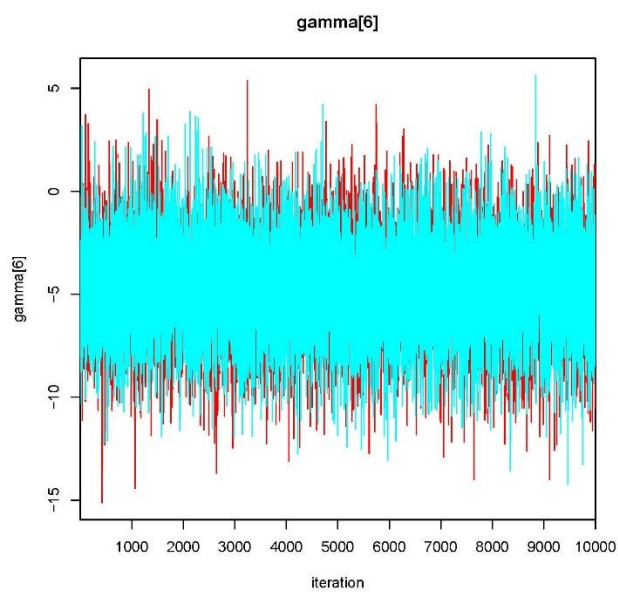

(c)

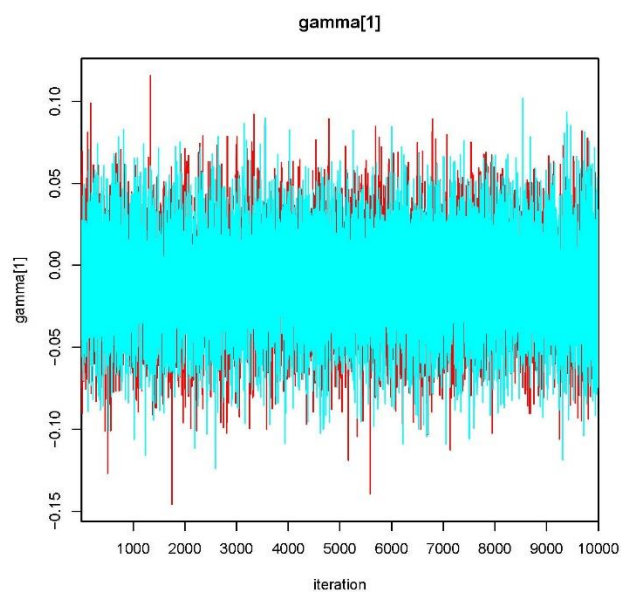

(d)

Figure S1. Example trace plots (post-burn-in iterations) of the item feature coefficients from the IE-HO-DINA-g and IE-HO-DINA-g-R models. (a) and (b) are from the IE-HO-DINA-g model; (c) and (d) are from the IE-HO-DINA-g-R model.
